# Supplementary material
Source: publisher figshare collection journal article supplement (https://acs.figshare.com/ndownloader/files/5754867)

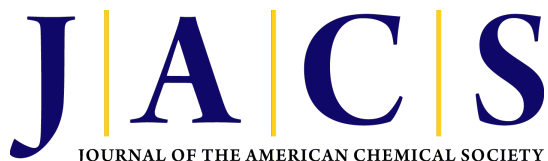

JOURNAL OF THE AMERICAN CHEMICAL SOCIETY

J. Am. Chem. Soc., 1998, 120(12), 2733-2745, DOI: [10.1021/ja9706920](https://doi.org/10.1021/ja9706920)

#### Terms & Conditions

Electronic Supporting Information files are available without a subscription to ACS Web Editions. The American Chemical Society holds a copyright ownership interest in any copyrightable Supporting Information. Files available from the ACS website may be downloaded for personal use only. Users are not otherwise permitted to reproduce, republish, redistribute, or sell any Supporting Information from the ACS website, either in whole or in part, in either machine-readable form or any other form without permission from the American Chemical Society. For permission to reproduce, republish and redistribute this material, requesters must process their own requests via the RightsLink permission system. Information about how to use the RightsLink permission system can be found at <http://pubs.acs.org/page/copyright/permissions.html>

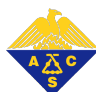

ACS Publications

MOST TRUSTED. MOST CITED. MOST READ.

Copyright © 1998 American Chemical Society

(*J. Am. Chem. Soc.* 11/19/97)  
JA9706920

## Infrared and Computational Studies of Spontaneously Adsorbed Amine Reagents on YBa<sub>2</sub>Cu<sub>3</sub>O<sub>7</sub>: Structural Characterization of Monolayers atop Anisotropic Superconductor Surfaces

Jason E. Ritchie, Cyndi A. Wells, Ji-Ping Zhou, Jianai Zhao, John T. McDevitt\*  
Department of Chemistry and Biochemistry  
The University of Texas at Austin, Austin, TX 78712

Carl R. Ankrum, Luckner Jean, David R. Kanis\*  
Department of Chemistry and Physics  
Chicago State University, Chicago, IL 60628

**Supplementary Figure S1:** Schematic illustration showing the relative crystallographic ordering characteristics for the various types of samples of YBa<sub>2</sub>Cu<sub>3</sub>O<sub>7</sub>. Shown in (A) is a polycrystalline ceramic sample; in (B) ordering characteristics fostered by the matching of substrate / film lattice dimensions (arrow represents the a-axis direction of the cuprate sample); in (C) a (001) oriented sample; in (D) a (100) oriented sample; and in (E) a twinned single crystal.

**Supplementary Figure S2:** Shown are the IR transition dipoles for a linear alkylamine adsorbed to YBa<sub>2</sub>Cu<sub>3</sub>O<sub>7</sub>. It is hypothesized that the high value for the tilt angle anticipated for the adsorbate monolayer leads to a decrease in the coupling of the methyl stretching dipole with the incident IR radiation. The shown orientation of the monolayer reagents should lead to a decrease in the GRIFTS signal observed for the methyl vibrations (see Figure 2A in the main section of the paper).

**Supplementary Figure S3:** Illustrations are included which are relevant to the spontaneous adsorption of alkylamines to YBa<sub>2</sub>Cu<sub>3</sub>O<sub>7</sub> (001) surfaces. Schematic perspectives of the alkylamine adsorption are provided from top and side views. This schematic clearly shows the footprint of the alkylamine on the YBa<sub>2</sub>Cu<sub>3</sub>O<sub>7</sub> (001) surface. From an analysis of the space filling model, it was determined that the most efficient packing of the monolayer reagents yields a molecular tilt angle ( $\theta_m$ ) of  $35 \pm 5^\circ$ . Note that this tilting is restricted to the nearest neighbor direction (i.e. within the (110) plane of YBa<sub>2</sub>Cu<sub>3</sub>O<sub>7</sub>). If the tilting occurs along the direction of next nearest neighbors (i.e. along (100) or (010) planes), a significantly larger tilt angle of  $\approx 50^\circ \pm 5^\circ$  can be accommodated.

**Supplementary Figure S4:** Illustrations are included, for comparison purposes, which are relevant to the spontaneous adsorption of alkylthiols to Au (111) surfaces. Schematic perspectives of the alkylthiol adsorption are provided from the top and side views. This schematic clearly shows the footprint of the alkylthiol on the Au (111) surface. From an analysis of the space filling model showing the side

perspective of alkylthiols adsorbed to Au (111), it was determined that the most efficient packing of the monolayer reagents yields a molecular tilt angle ( $\theta_m$ ) of  $27 \pm 5^\circ$ .

**Supplementary Figure S5:** Molecular modeling results of the alkylthiol / gold(111) case are provided. Illustrated here are two space filling molecular models, and a surface energy vs. in-plane tilt angle plot. Shown in (A) is a side view of the adsorption of alkylthiols to gold (111). Shown in (B) is a view down the molecular axis of the adsorbate molecules. Shown in (C) is a plot of the surface energy versus the in-plane tilt angle of the alkylthiol adsorbate molecules.

**Supplementary Figure S6:** Information analogous to that provided in Figure 11 is included here for an alternative energy minimized structure having  $\theta_{ip}=32^\circ$ ,  $\theta_{op}=14^\circ$ , and  $\alpha=120^\circ$ . For this system, the following three curves are shown: (A) energy vs.  $\theta_{ip}$  where  $\theta_{op}=14^\circ$  and  $\alpha=120^\circ$  are fixed, (B) energy vs.  $\theta_{op}$  where  $\theta_{ip}=32^\circ$  and  $\alpha=120^\circ$ , and (C) energy vs.  $\alpha$  where  $\theta_{ip}=32^\circ$  and  $\theta_{op}=14^\circ$ .

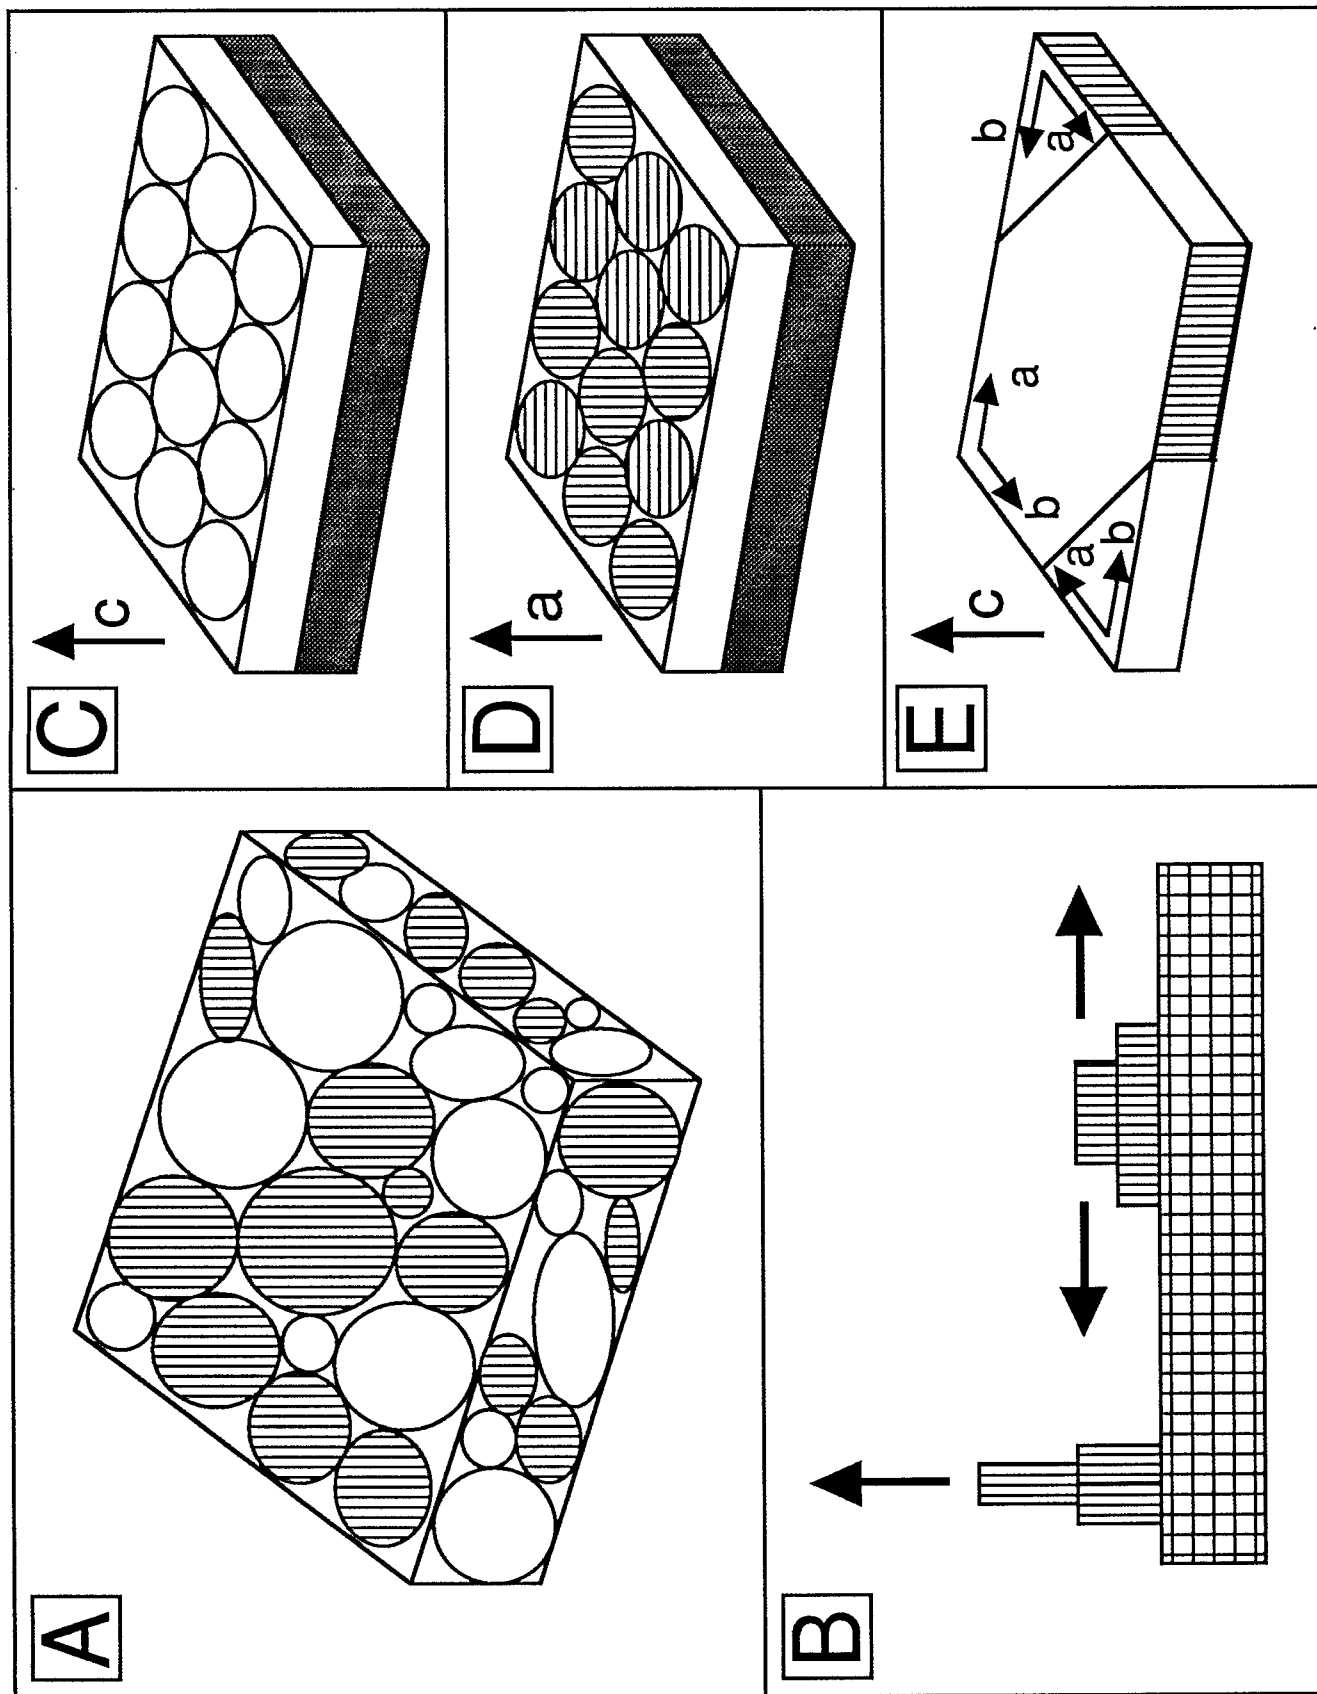

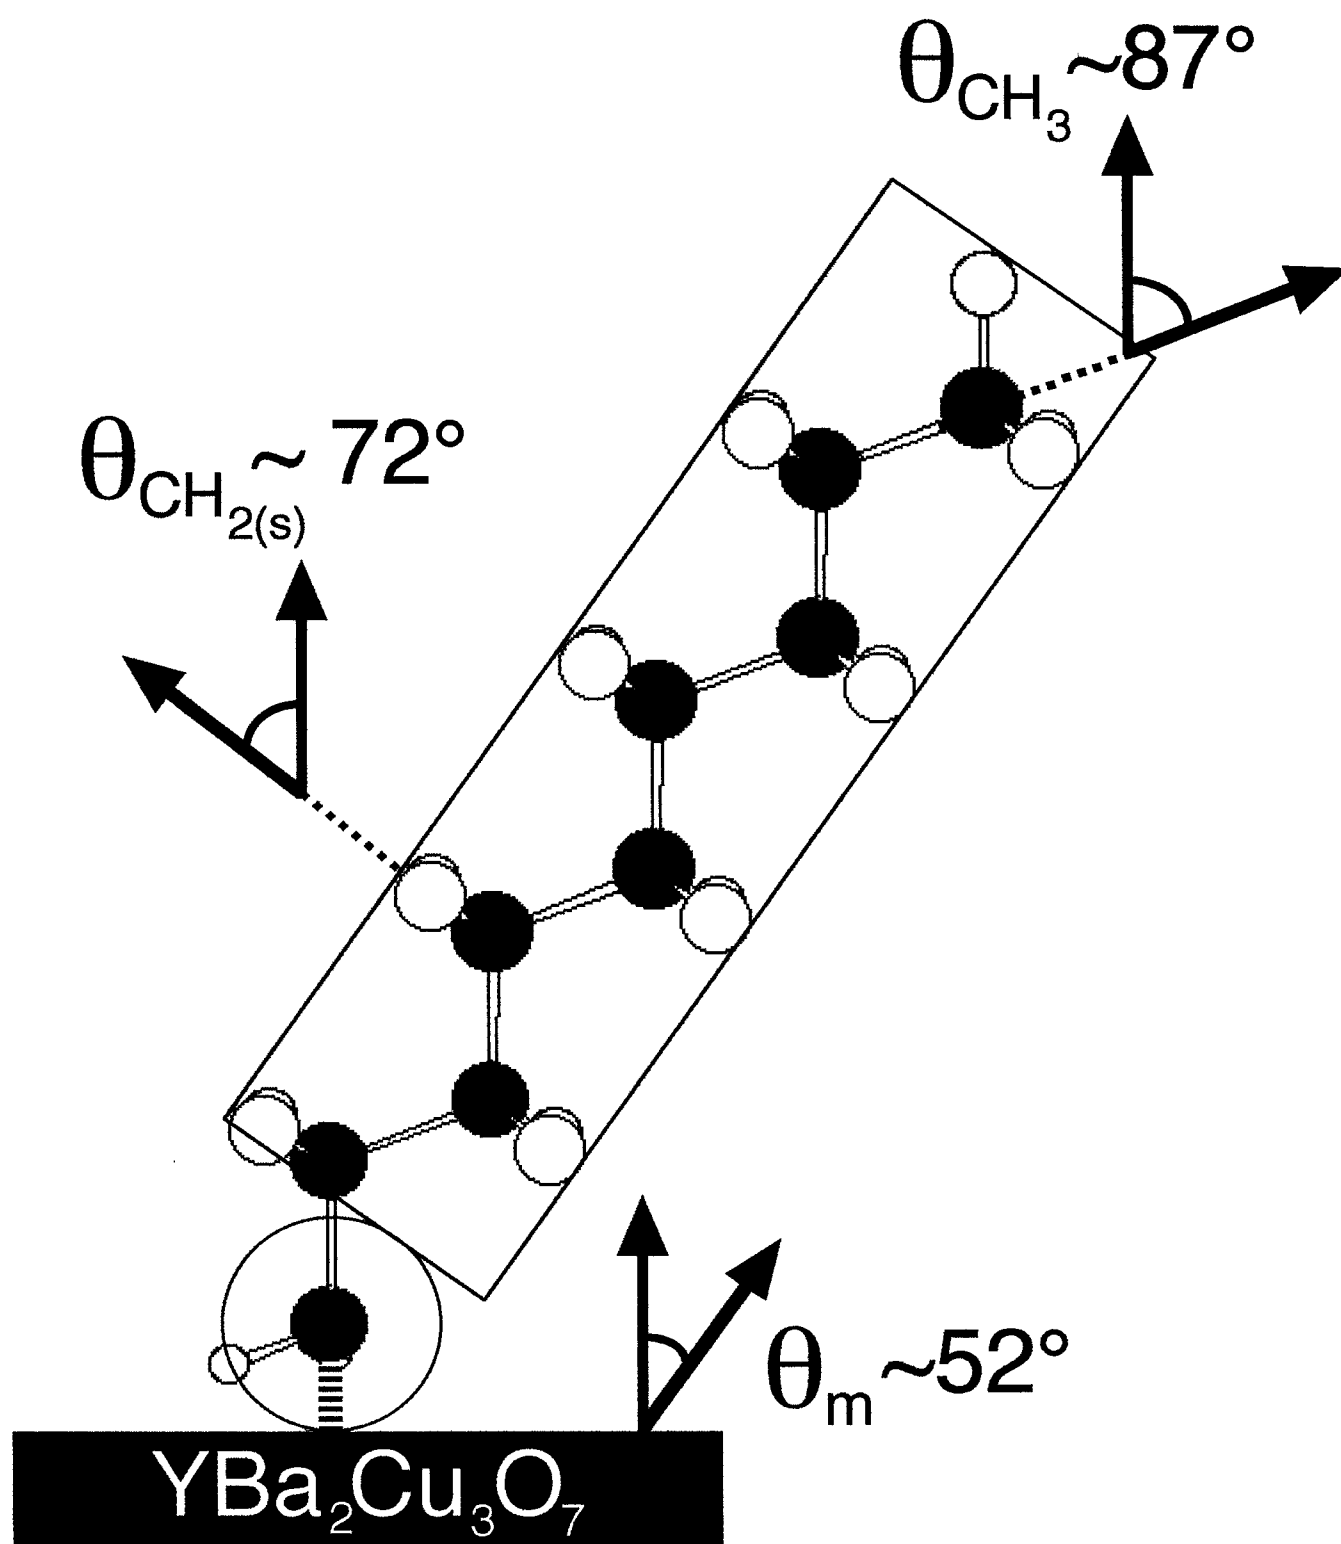

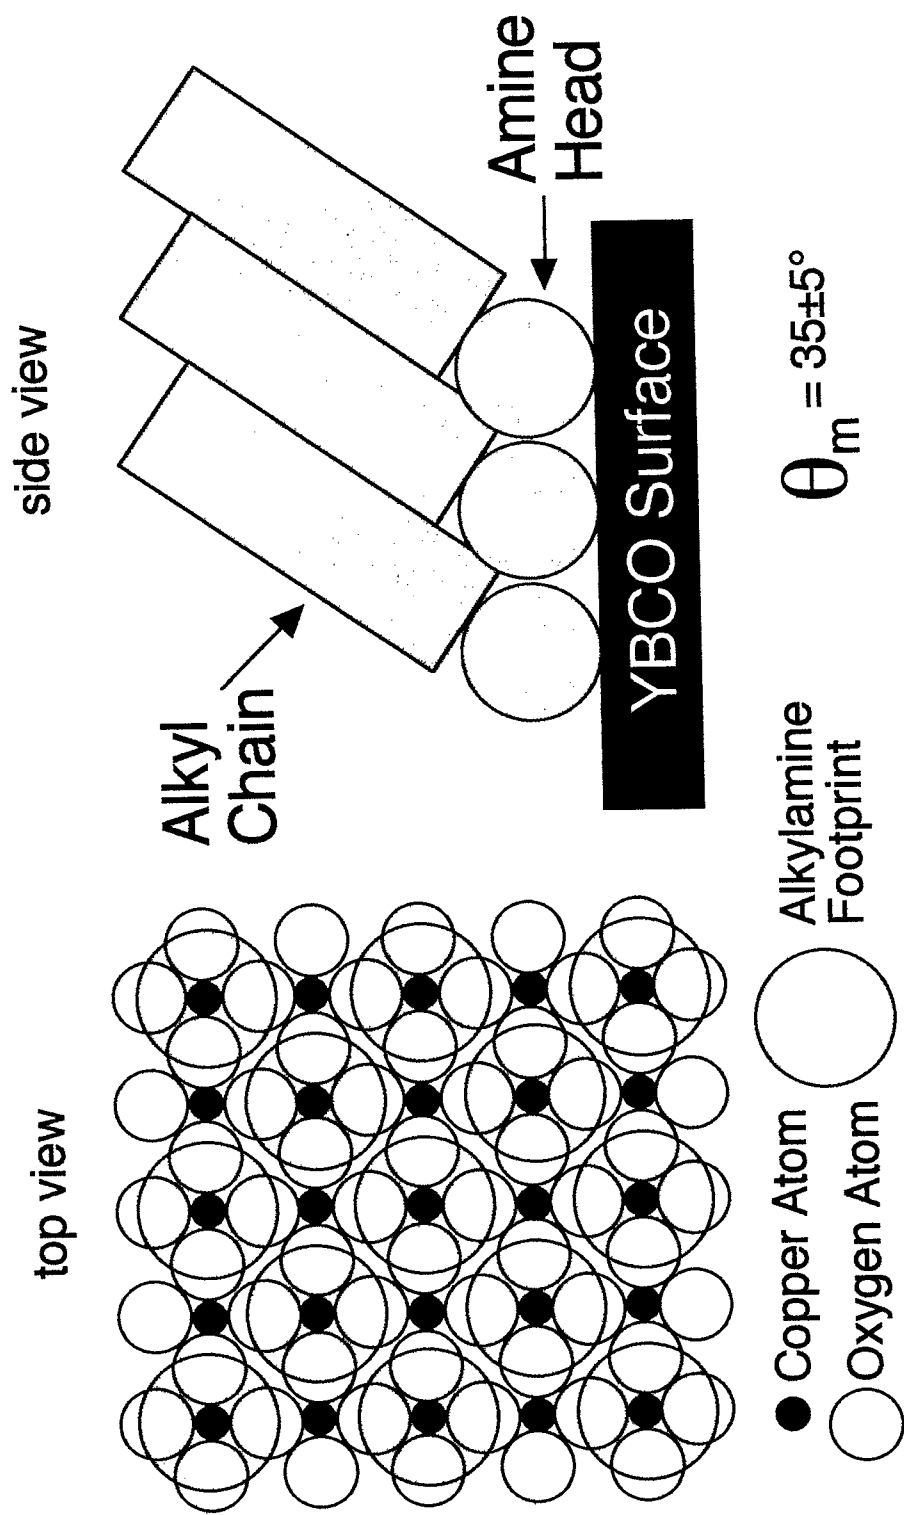

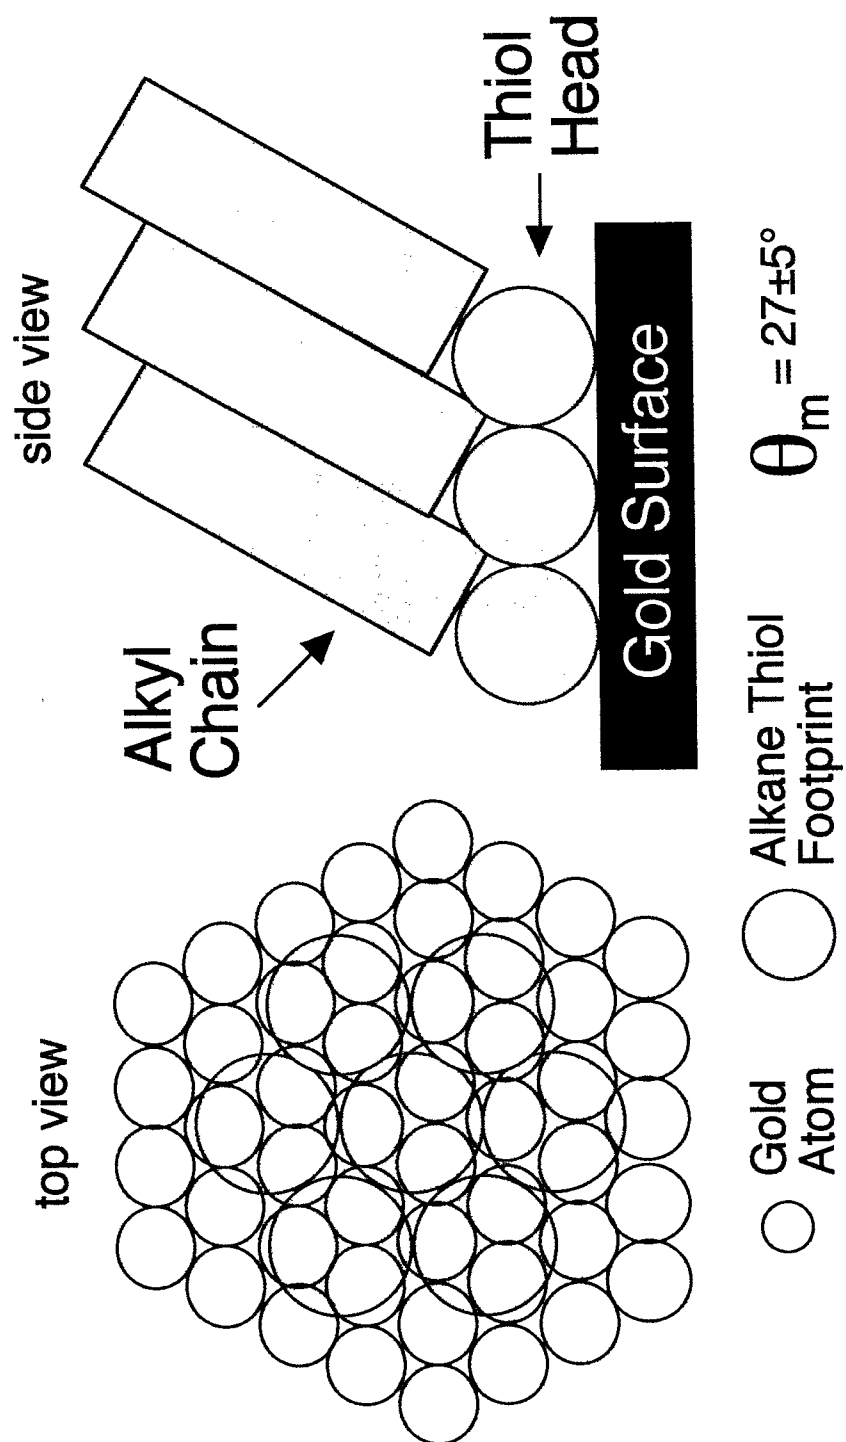

**A**

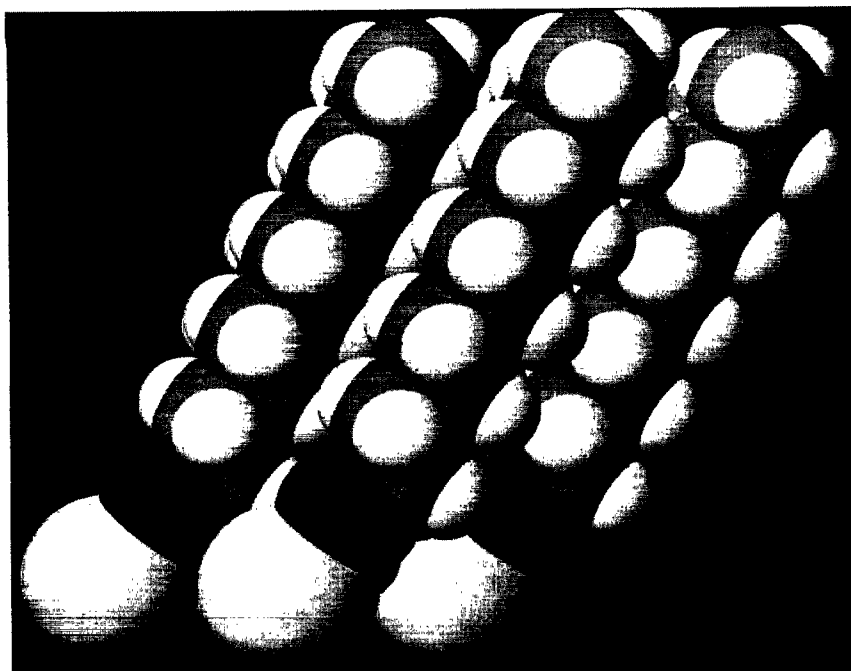

**B**

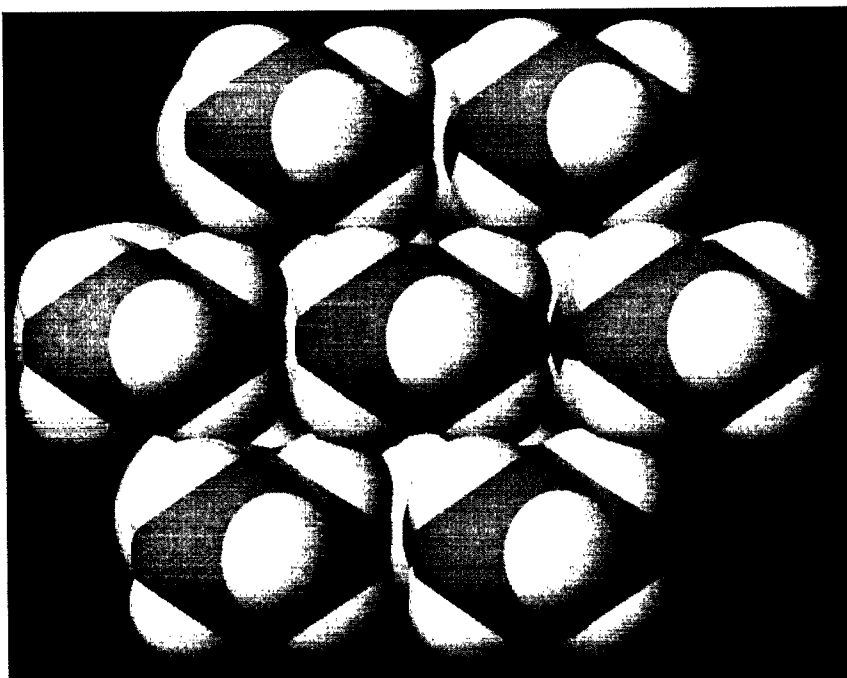

**C**

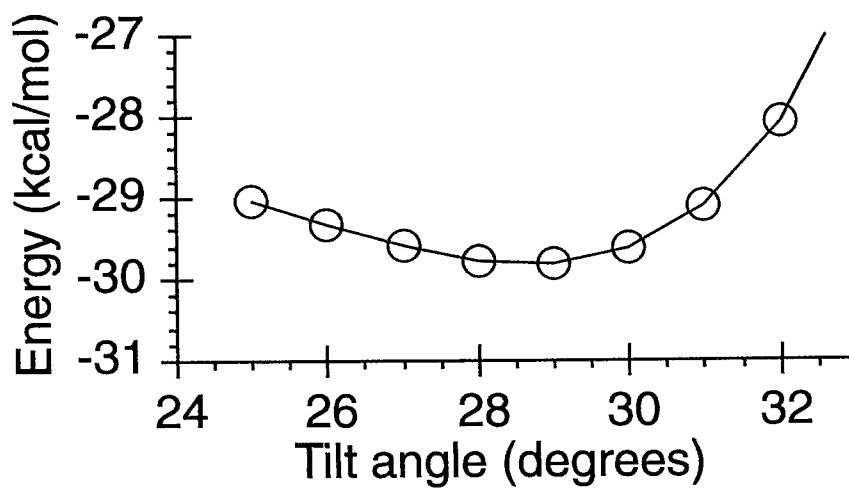

**A**

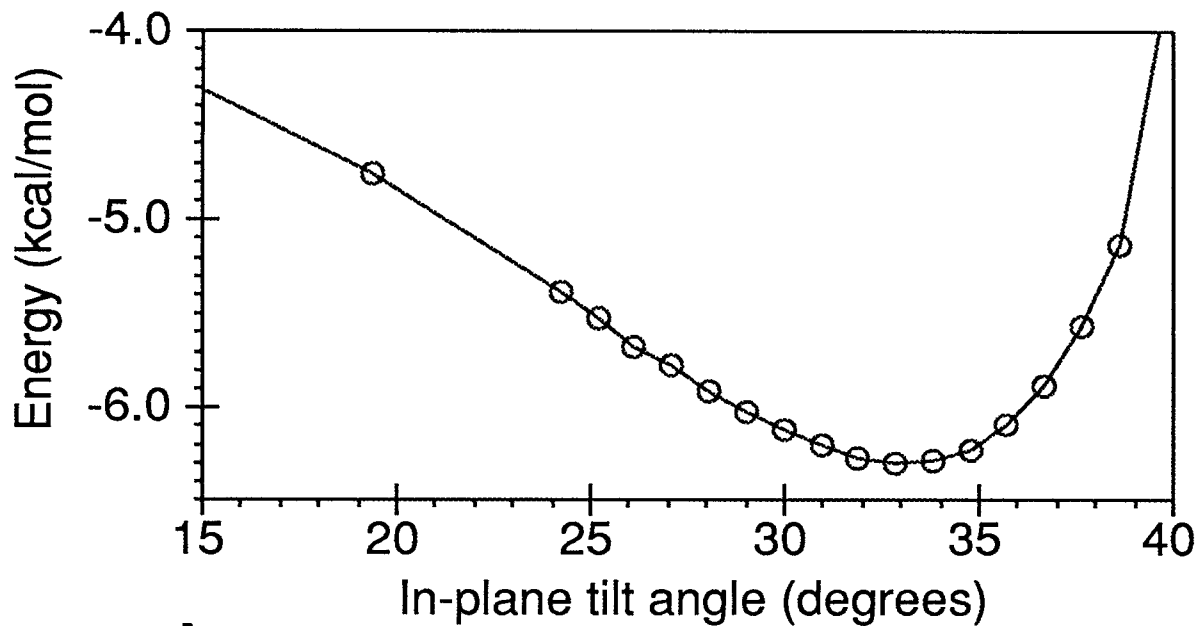

**B**

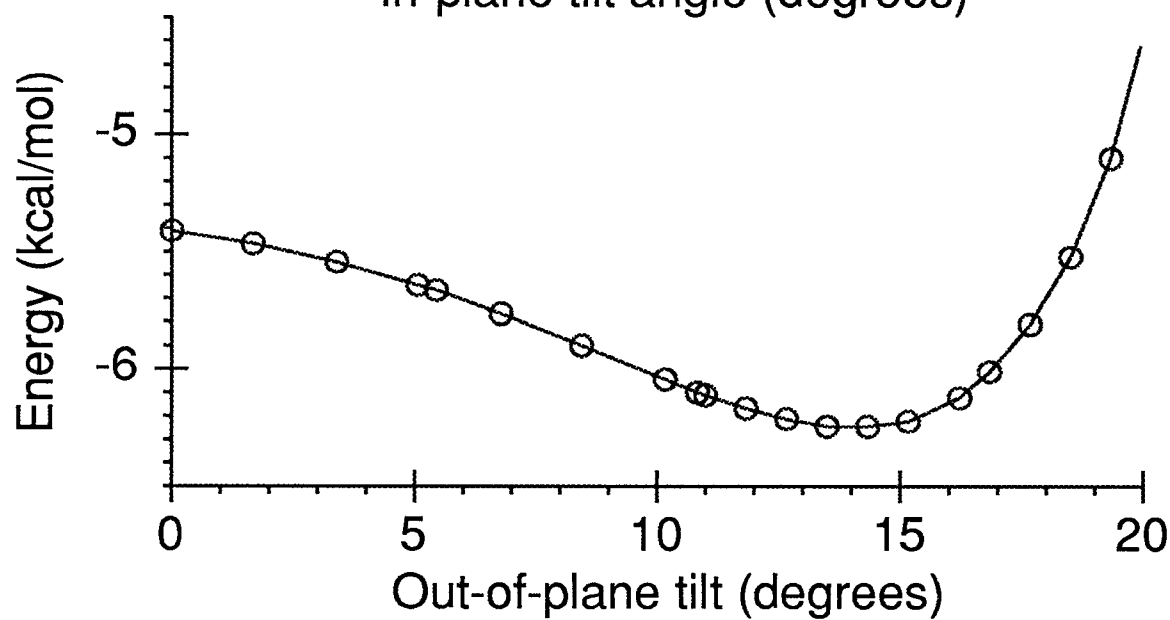

**C**

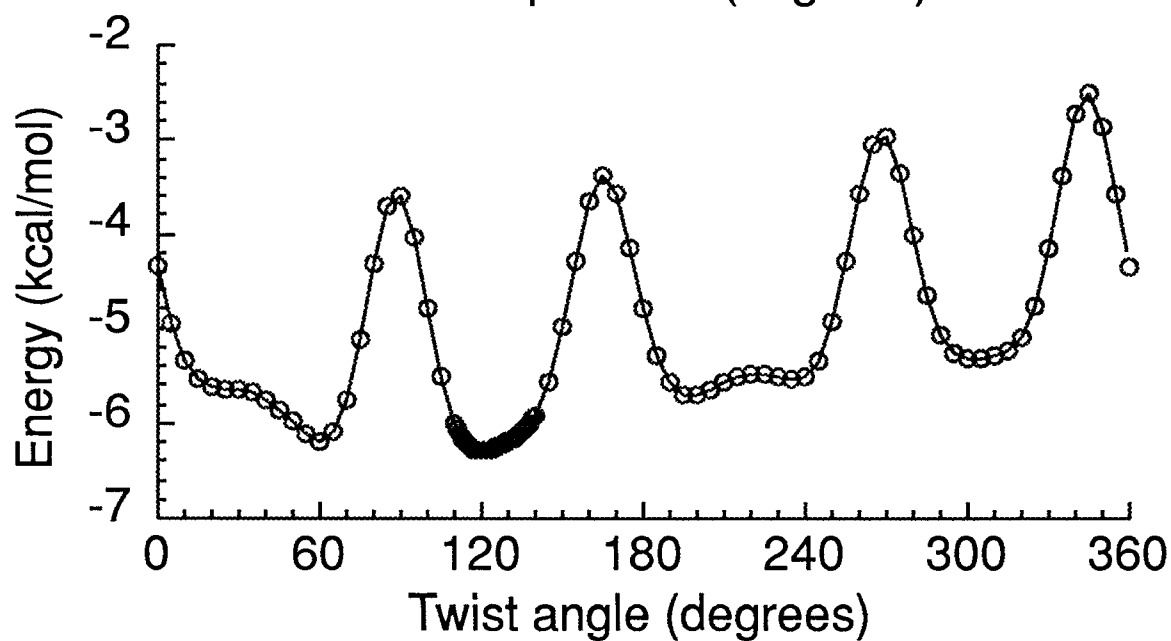

Supplement: Supplementary file 1 [file 5754867]
